# Supplementary material for: Economic Burden of Pneumococcal Disease in Individuals Aged 15 Years and Older in the Liguria Region of Italy
Source: MDPI journal article supplement (doi:10.3390/vaccines9121380), 2021-11-24
Supplement: s1 [file s1]

**Supplemental Table S1.** Search terms and ICD-9 codes of pneumococcal disease.

| Manifestation | ICD-9-CM Code          |
|---------------|------------------------|
| Pneumonia     | 481                    |
|               | 482.9 and 041.2        |
|               | 485 and 041.2          |
|               | 486 and 041.2          |
|               | 482.9                  |
|               | 485                    |
|               | 486                    |
|               | 480.x                  |
|               | 481                    |
|               | 482.x                  |
|               | 483.x                  |
|               | 484.x                  |
|               | 485                    |
|               | 486                    |
|               | 487.0                  |
| Meningitis    | 320.1                  |
|               | 320.2 and 041.2        |
|               | 320.82/320.9 and 041.2 |
|               | 322.9 and 041.2        |
|               | 320.2                  |
| Bacteremia    | 320.82/320.9           |
|               | 038.2                  |
|               | 038.0 and 041.2        |
|               | 038.9 and 041.2        |
|               | 790.7 and 041.2        |
|               | 038.0                  |
|               | 038.9                  |
|               | 790.7                  |
| AOM           | 381.x                  |
|               | 382.x                  |
|               | 384.0                  |

AOM: acute otitis media; ICD-9-CM: International Classification of Diseases, Ninth Revision, Clinical Modification.
